# Supplementary material for: β-Cyclodextrin functionalized 3D reduced graphene oxide composite-based electrochemical sensor for the sensitive detection of dopamine
Source: Royal Society of Chemistry journal article supplement (doi:10.1039/d1ra02313f), 2021-01-01
Supplement: d1ra02313f1.pdf [file d1ra02313f1.pdf]

**Electronic Supplementary Material (ESI) for RSC Advances.**

**Supporting information**

**$\beta$ -Cyclodextrin Functionalized 3D Reduced Graphene Oxide Composite-Based  
Electrochemical Sensor for the Sensitive Detection of Dopamine**

Xuan Chen <sup>a</sup>, Na Li <sup>a</sup>, Yanqin Rong <sup>c</sup>, Yuli Hou <sup>b\*</sup>, Yu Huang <sup>c</sup>, Wenting Liang <sup>c\*</sup>

<sup>a</sup> Department of Neurology, Taiyuan Central Hospital of Shanxi Medical University, Taiyuan 030062, China.

<sup>b</sup> Department of Neurology, First Hospital of Shanxi Medical University, Taiyuan 030001, China. E-mail: houyuli2008@163.com

<sup>c</sup> Institute of Environmental Science, Shanxi University, Taiyuan 030006, China. E-mail: liangwt@sxu.edu.cn

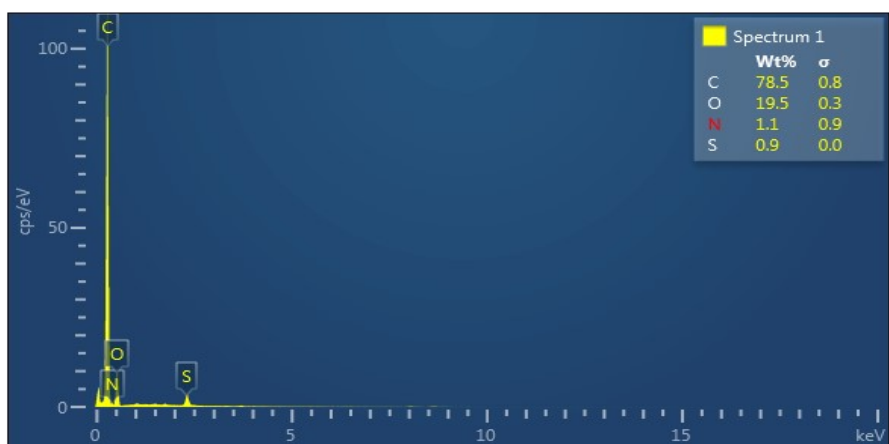

**Fig. S1.** EDS of 3D-rGO/ $\beta$ -CD composites.

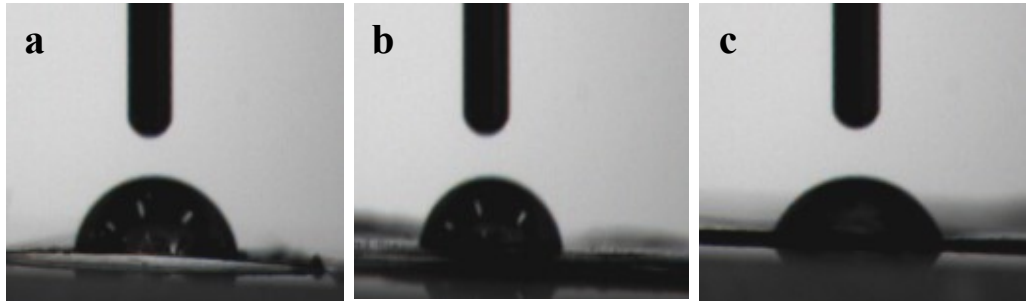

**Fig. S2** Contact-angle photographs of GO (a), 3D-rGO (b) and 3D-rGO/ $\beta$ -CD (c) modified substrates

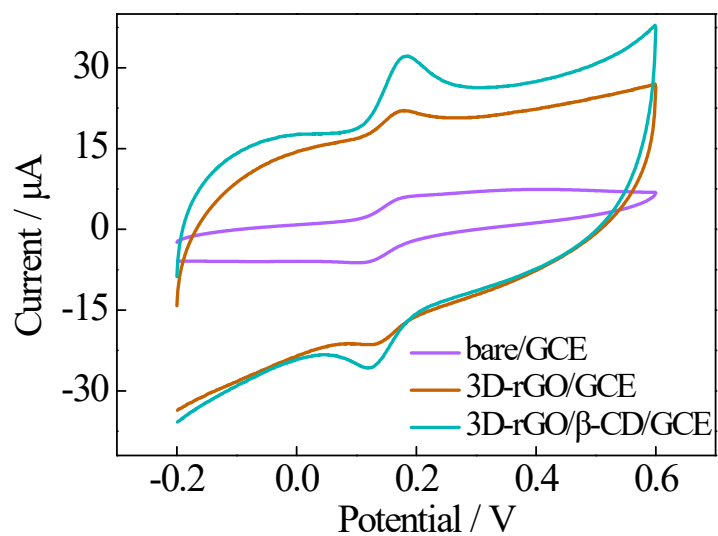

**Fig. S3** CV curves of various modified electrodes with bare GCE, 3D-rGO/GCE, and 3D-rGO/ $\beta$ -CD/GCE were recorded in the 0.1 M PB solution of contained DA (100.0  $\mu\text{M}$ ) (pH 7.0). Scan rate: 0.1 V/s; working potential: -0.2 V - 0.6 V (vs SCE)

### **Method for calculating of limit of detection (LOD) <sup>1-3</sup>.**

LOD is calculated using the following relation based on the linear calibration equation according to IUPAC definition, S/N=3 (signal-to-noise ratio).  $LOD = 3S/b$ , where S is the standard deviation of the blank experiment (namely, standard deviation of background current at the peak position via running parallel determination for ten times in blank electrolytes at 3D-rGO/ $\beta$ -CD/GCE), and b is slope of calibration plot of DA ( $0.296 \mu\text{A } \mu\text{M}^{-1}$ ). Putting the values in the above formula gives the LOD.

### **References**

1. Y. Wang, Y. Q. Chen, H. Bian, Y. W. Sun, L. J. Zhu, D. H. Xia, *Sens. Actuators B-Chem.*, 2021, 341, 130044.
2. P. Lei, Y. Zhou, R. Q. Zhu, Y. Liu, C. Dong, S. M. Shuang, *Biosens. Bioelectron.*, 2020, 147, 111735.
3. M. Zheng, Y. Wang, C. Wang, W. Wei, S. Ma, X. Sun, J. He, *Spectrochim. Acta A.*, 2018, 19, 315-321.

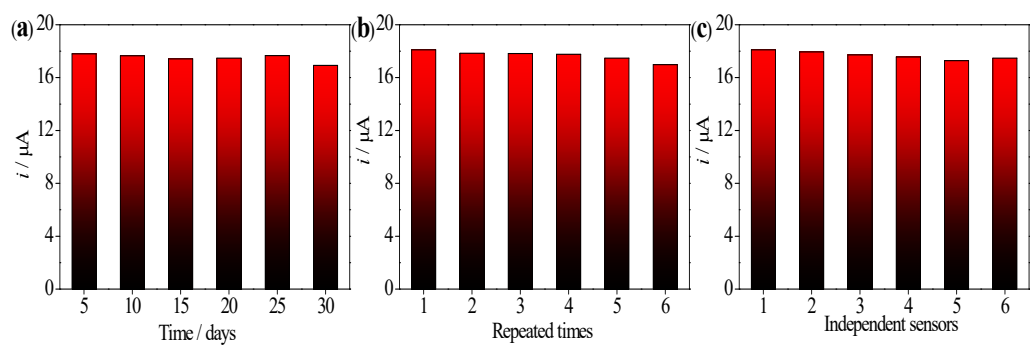

**Fig. S4** The cartograms of (a) storage stability (b) repeatability and (c) reproducibility of the 3D-rGO/ $\beta$ -CD/GCE sensor.

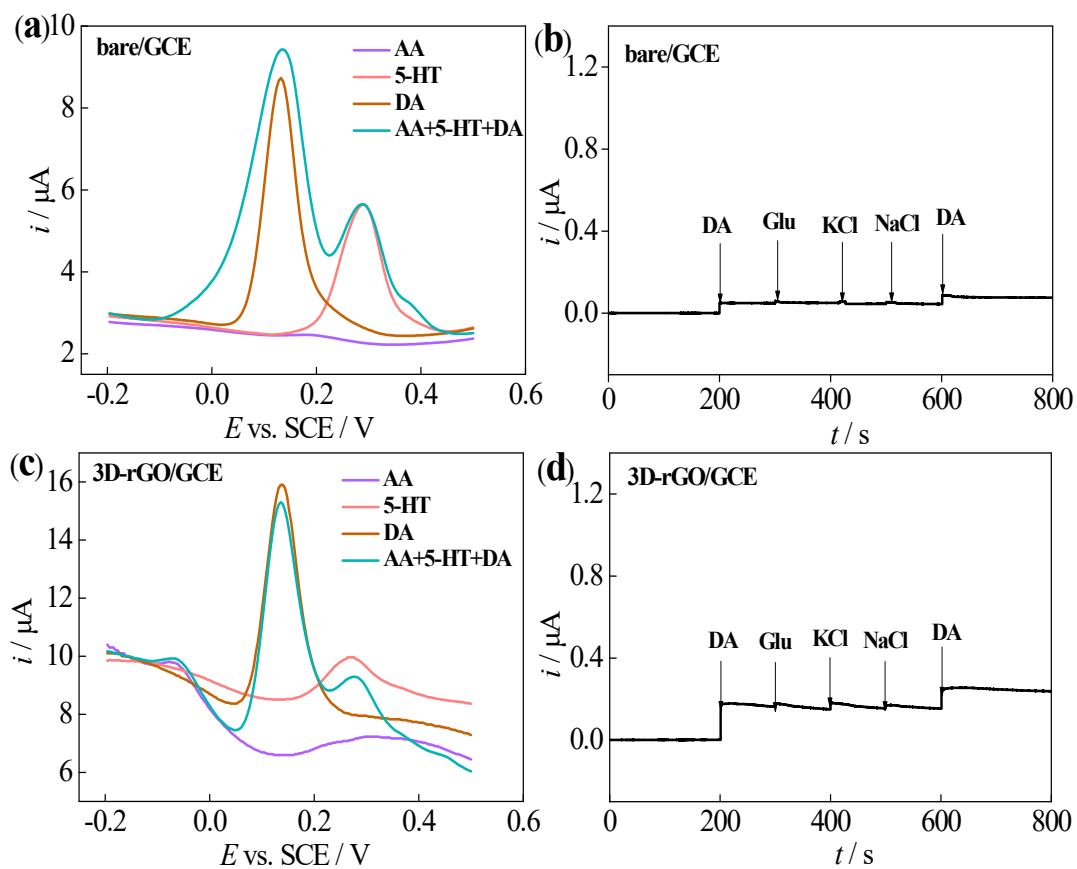

**Fig. S5** (a) DPV responses of bare/GCE (a), 3D-rGO/GCE (c) in 0.1 M PB solution (pH =7.0) for 1 mM AA, 100  $\mu\text{M}$  DA, 100  $\mu\text{M}$  5-HT and the mixture of 1 mM AA, 100  $\mu\text{M}$  DA and 100  $\mu\text{M}$  5-HT. (b) Amperometric responses of the bare/GCE (b), 3D-rGO/GCE (d) for the addition of 100  $\mu\text{M}$  DA and 200  $\mu\text{M}$  glucose, 200  $\mu\text{M}$  KCl and 200  $\mu\text{M}$  NaCl in 0.1 M PB solution (pH = 7.0).

**Table S1.** Determination of DA in human serum and urine samples by DPV

| <b>Samples</b>       | <b>Original (<math>\mu\text{M}</math>)</b> | <b>Spiked (<math>\mu\text{M}</math>)</b> | <b>Found (<math>\mu\text{M}</math>)</b> | <b>Recovery (%)</b> | <b>RSD* (%)</b> |
|----------------------|--------------------------------------------|------------------------------------------|-----------------------------------------|---------------------|-----------------|
| <b>Serum samples</b> | <sup>a</sup> Not Found                     | 5.00                                     | 5.12                                    | 102.4               | 2.63            |
|                      |                                            | 10.00                                    | 10.05                                   | 100.5               | 2.14            |
|                      |                                            | 20.00                                    | 19.88                                   | 99.40               | 1.99            |
|                      |                                            | 30.00                                    | 30.09                                   | 100.3               | 1.45            |
|                      |                                            | 50.00                                    | 49.89                                   | 99.78               | 2.08            |
| <b>Urine samples</b> | <sup>b</sup> 0.72                          | 5.00                                     | 5.66                                    | 98.8                | 2.35            |
|                      |                                            | 10.00                                    | 10.89                                   | 101.7               | 2.71            |
|                      |                                            | 20.00                                    | 20.78                                   | 100.3               | 1.98            |
|                      |                                            | 30.00                                    | 30.65                                   | 99.8                | 2.51            |
|                      |                                            | 50.00                                    | 50.84                                   | 100.2               | 3.39            |

<sup>a</sup> Dilute 5 times with PB (0.1 M, pH=7.0).

<sup>b</sup> Dilute 2 times with PB (0.1 M, pH=7.0).

\* RSD value reported is for n=5.
